# Supplementary material
Source: publisher site journal article supplement (https://www.dovepress.com/article/126270)
Supplement: Supplementary file 1 [file get_supplementary_file.php]

## Supplementary material: Learning resources for IEHPs

| ALBERTA                                                                                                                                                                                                                                                                                                                                                                                                                                                                                                     |                                       |                                                                                                                                                    |                                                                                                          |                                                                  |                                      |                          |
|-------------------------------------------------------------------------------------------------------------------------------------------------------------------------------------------------------------------------------------------------------------------------------------------------------------------------------------------------------------------------------------------------------------------------------------------------------------------------------------------------------------|---------------------------------------|----------------------------------------------------------------------------------------------------------------------------------------------------|----------------------------------------------------------------------------------------------------------|------------------------------------------------------------------|--------------------------------------|--------------------------|
| Learning Resource Information:<br>Name, Inst., Dept., Weblink                                                                                                                                                                                                                                                                                                                                                                                                                                               | Target Professionals                  | Content                                                                                                                                            |                                                                                                          |                                                                  | Duration                             | Delivery Format          |
|                                                                                                                                                                                                                                                                                                                                                                                                                                                                                                             |                                       | Cultural Diversity                                                                                                                                 | Canadian Health Care Orientation                                                                         | Interprofessional Competencies                                   |                                      |                          |
| <b>Communication Skills for Health Professionals</b><br><br>Mount Royal University* and MacEwan University*<br><br><i>** Both Universities deliver the same course. Based on Kwantlen Polytechnic University course (discontinued). Also draw on U of Toronto orientation to Canadian health system course</i><br><a href="http://www.mtroyal.ca/ProgramsCourses/ContinuingEducation/languages/PC-IEHP/index.htm">http://www.mtroyal.ca/ProgramsCourses/ContinuingEducation/languages/PC-IEHP/index.htm</a> | Midwives, Nurses and Physicians       | Increase cultural competence, communication skills and strategies, and language to work effectively with culturally diverse clients and colleagues | Orientation to the Canadian Health Care System, Culture and Context (from University of Toronto course)  | General focus on communication skills                            | 12 weeks (270 hrs)                   | Face-to-face instruction |
| Grant MacEwan University, English Language Institute, also offered at a number of other English language institutes in Alberta<br><a href="http://www.catholicsocialservices.ab.ca/Content_Files/Files/ESLdirectory.pdf">http://www.catholicsocialservices.ab.ca/Content_Files/Files/ESLdirectory.pdf</a>                                                                                                                                                                                                   | All health professionals (immigrants) | Communication skills                                                                                                                               |                                                                                                          | General focus on communication skills for health professionals   | 4 months (4.5 hrs/week)              | Face-to-face instruction |
| <b>Practical Nurse Diploma For Internationally Educated Nurses</b><br><br>NorQuest College                                                                                                                                                                                                                                                                                                                                                                                                                  | LPNs                                  | Intercultural Communication for Nursing: working diverse health care settings and with diverse clients and colleagues                              | Introduction to the study of society: introduces ideas about social relationships, community and society | Communications for Nursing: covers relationships within IP teams | 19 months program (inactive 2013/14) | Face-to-face             |

| ALBERTA                                                                                                                                                                                                                                                                                                                                                                               |                      |                                                                                                                                                   |                                                                                                                                                                                                                                            |                                                      |                                                                                                |                                                    |
|---------------------------------------------------------------------------------------------------------------------------------------------------------------------------------------------------------------------------------------------------------------------------------------------------------------------------------------------------------------------------------------|----------------------|---------------------------------------------------------------------------------------------------------------------------------------------------|--------------------------------------------------------------------------------------------------------------------------------------------------------------------------------------------------------------------------------------------|------------------------------------------------------|------------------------------------------------------------------------------------------------|----------------------------------------------------|
| Learning Resource Information:<br>Name, Inst., Dept., Weblink                                                                                                                                                                                                                                                                                                                         | Target Professionals | Content                                                                                                                                           |                                                                                                                                                                                                                                            |                                                      | Duration                                                                                       | Delivery Format                                    |
|                                                                                                                                                                                                                                                                                                                                                                                       |                      | Cultural Diversity                                                                                                                                | Canadian Health Care Orientation                                                                                                                                                                                                           | Interprofessional Competencies                       |                                                                                                |                                                    |
| <a href="http://www.norquest.ca/cal/2012-2013/program/practical-nurse-diploma-for-internationally-educated-nurses/further-opportunities.aspx">http://www.norquest.ca/cal/2012-2013/program/practical-nurse-diploma-for-internationally-educated-nurses/further-opportunities.aspx</a><br>(restructured in collaboration with Bow Valley)                                              |                      | Health education: Individual health and wellness: explores Canadian society and physical and social determinants of health                        | Intercultural Communication for nursing: working diverse health care settings and with diverse clients and colleagues<br>Nursing foundations I: Orientation to Canadian health system<br>Health education – Individual health and wellness |                                                      |                                                                                                |                                                    |
| <b>Bridging Program Internationally Educated Physiotherapists</b><br>University of Alberta<br><br><a href="https://rehabilitation.ualberta.ca/departments/physical-therapy/alberta-internationally-educated-physiotherapists-bridging-program">https://rehabilitation.ualberta.ca/departments/physical-therapy/alberta-internationally-educated-physiotherapists-bridging-program</a> | PTs                  | Cultural and workplace orientation is provided facilitate the integration of internationally educated PTs into the Canadian health care workplace | Introduces the context of Canadian Physical Therapy (PT) practice, the Canadian and Alberta health care system, clinical reasoning and professional communication                                                                          |                                                      | 14 months                                                                                      | Blended format of online and face-to-face learning |
| <b>Practical Nurse Diploma for Internationally Educated Nurses</b><br>Bow Valley College<br><br><a href="http://bowvalleycollege.ca/programs-and-courses/health-care/practical-nurse-programs/practical-nurse-">http://bowvalleycollege.ca/programs-and-courses/health-care/practical-nurse-programs/practical-nurse-</a>                                                             | LPNs                 |                                                                                                                                                   |                                                                                                                                                                                                                                            | Interpersonal relationships and communication skills | Around 12 months, only one module focuses on communication skills (prepares for LPN licensure) | Face-to- face                                      |

| ALBERTA                                                                                                                                                                                                                                                                                                                                                            |                      |                                                 |                                                                                                                        |                                                   |                            |                 |
|--------------------------------------------------------------------------------------------------------------------------------------------------------------------------------------------------------------------------------------------------------------------------------------------------------------------------------------------------------------------|----------------------|-------------------------------------------------|------------------------------------------------------------------------------------------------------------------------|---------------------------------------------------|----------------------------|-----------------|
| Learning Resource Information:<br>Name, Inst., Dept., Weblink                                                                                                                                                                                                                                                                                                      | Target Professionals | Content                                         |                                                                                                                        |                                                   | Duration                   | Delivery Format |
|                                                                                                                                                                                                                                                                                                                                                                    |                      | Cultural Diversity                              | Canadian Health Care Orientation                                                                                       | Interprofessional Competencies                    |                            |                 |
| <a href="http://www.mtroyal.ca/ProgramsCourses/FacultiesSchoolsCentres/HealthCommunityStudies/Programs/BridgetoCanadianNursing/index.htm">diploma-for-internationally-educated-nurses.html</a>                                                                                                                                                                     |                      |                                                 |                                                                                                                        |                                                   |                            |                 |
| <b>Bridge to Canadian Nursing - BCN Program</b><br><br>Mount Royal University<br><br><a href="http://www.mtroyal.ca/ProgramsCourses/FacultiesSchoolsCentres/HealthCommunityStudies/Programs/BridgetoCanadianNursing/index.htm">http://www.mtroyal.ca/ProgramsCourses/FacultiesSchoolsCentres/HealthCommunityStudies/Programs/BridgetoCanadianNursing/index.htm</a> | RNs                  | Enhance your professional nursing communication | Professional nursing in Canada<br>Build nursing knowledge and nursing practice skills in Canadian health care settings | Professional communication skills for nurses      | Completed in 3-4 semesters | Face-to-face    |
| <b>International Pharmacy Bridging Program,</b><br><br>Bredin Centre for learning, AB<br><br><a href="http://www.bredin.ca/international-pharmacy-bridging-program-edmonton">http://www.bredin.ca/international-pharmacy-bridging-program-edmonton</a>                                                                                                             | Pharmacists          |                                                 | Improved knowledge and skill in therapeutics, ethics and jurisprudence and communication                               | Helps with obtaining Canadian licence to practice | 41 weeks                   | Face-to-face    |

| BRITISH COLUMBIA                                                                                                                                                                                                                                                                                                                                      |                                              |                                                                                                                                                                                                                                                                               |                                                                                                                                                                                                                                                            |                                                                                                                                                                                                                                                                            |                                                           |                                           |
|-------------------------------------------------------------------------------------------------------------------------------------------------------------------------------------------------------------------------------------------------------------------------------------------------------------------------------------------------------|----------------------------------------------|-------------------------------------------------------------------------------------------------------------------------------------------------------------------------------------------------------------------------------------------------------------------------------|------------------------------------------------------------------------------------------------------------------------------------------------------------------------------------------------------------------------------------------------------------|----------------------------------------------------------------------------------------------------------------------------------------------------------------------------------------------------------------------------------------------------------------------------|-----------------------------------------------------------|-------------------------------------------|
| Course Information:<br>Name, Inst., Dept., Weblink                                                                                                                                                                                                                                                                                                    | Target Professionals                         | Course Content                                                                                                                                                                                                                                                                |                                                                                                                                                                                                                                                            |                                                                                                                                                                                                                                                                            | Course Duration                                           | Delivery Format                           |
|                                                                                                                                                                                                                                                                                                                                                       |                                              | Cultural Diversity                                                                                                                                                                                                                                                            | Canadian Health Care Orientation                                                                                                                                                                                                                           | Interprofessional Competencies                                                                                                                                                                                                                                             |                                                           |                                           |
| <b>Graduate Nurse, Internationally Educated Re-Entry Certificate</b><br><br>Kwantlen Polytechnic University, Faculty of Health<br><br><a href="http://www.kpu.ca/calendar/2014-15/health/graduatenuurseinternationallyeducatedreentry-cert.html">http://www.kpu.ca/calendar/2014-15/health/graduatenuurseinternationallyeducatedreentry-cert.html</a> | RNs                                          | Relational Engagement: how personal beliefs, values and experiences influence caring relationships in nursing practice<br>Prof Nursing Theory I: personal, public and professional values and expectations awareness of cultural influences, including Aboriginal populations | Professional Nursing Practice 1, 2 and 3<br><br>Professional Nursing Theory 1, 2 and 3                                                                                                                                                                     | Relational Engagement<br><br>Professional Nursing Practice 1, 2 and 3, includes effective working relationships with health care team                                                                                                                                      | 3 semesters (300 hrs classroom 500 hrs clinical practice) | Full-time, blended                        |
| <b>Nursing Practice in Canada (post degree diploma)</b><br>Langara College, Division of Health<br><br><a href="http://www.langara.bc.ca/programs-and-courses/programs/nursing-practice-in-canada/program-curriculum.html">http://www.langara.bc.ca/programs-and-courses/programs/nursing-practice-in-canada/program-curriculum.html</a>               | RNs                                          | Culture and Health: explores indigenous and immigrant health and how culture influences nurse-client relationships                                                                                                                                                            | Nursing Prof & Health Care I: competencies, standards and scope of practice in Canada along with communication and social determinants of health and health care<br>Common Health Challenges in Canada: Increases knowledge and skills in Canadian context | Professional communication I: focus on health care management setting<br>Clinical Skills lab I and II: includes collaboration<br>Clinical Simulation: includes communication and team collaboration<br>Clinical Nursing Practice: includes communication and collaboration | 2 years (full-time)                                       | Classroom (lecture and seminar)           |
| <b>Return to RN Practice Certificate</b><br>Thompson Rivers University, Open Learning<br><br><a href="http://www.tru.ca/distance/programs/nursing/registered-nurse-practice-certificate.html">http://www.tru.ca/distance/programs/nursing/registered-nurse-practice-certificate.html</a>                                                              | RNs (with Psy N transition course available) | Relational Practice: covers diversity in families and communities                                                                                                                                                                                                             | Return to RN practice                                                                                                                                                                                                                                      | Professional growth (includes IP practice)<br>Relational Practice (inc collab practice and IP care)                                                                                                                                                                        | Up to 3 years                                             | Online with some classroom labs (blended) |

| BRITISH COLUMBIA                                                                                                                                                                                                                    |                      |                                                                                                                                                                |                                                                                                                     |                                                                                                                         |                 |                                                            |
|-------------------------------------------------------------------------------------------------------------------------------------------------------------------------------------------------------------------------------------|----------------------|----------------------------------------------------------------------------------------------------------------------------------------------------------------|---------------------------------------------------------------------------------------------------------------------|-------------------------------------------------------------------------------------------------------------------------|-----------------|------------------------------------------------------------|
| Course Information:<br>Name, Inst., Dept., Weblink                                                                                                                                                                                  | Target Professionals | Course Content                                                                                                                                                 |                                                                                                                     |                                                                                                                         | Course Duration | Delivery Format                                            |
|                                                                                                                                                                                                                                     |                      | Cultural Diversity                                                                                                                                             | Canadian Health Care Orientation                                                                                    | Interprofessional Competencies                                                                                          |                 |                                                            |
| <a href="http://www.tru.ca/distance/programs/nursing/transition-courses-nursing.html">http://www.tru.ca/distance/programs/nursing/transition-courses-nursing.html</a>                                                               |                      |                                                                                                                                                                |                                                                                                                     |                                                                                                                         |                 |                                                            |
| <b>Physician Integration Program (BC-PIP)</b><br><br>University of British Columbia, Faculty of Medicine<br><br><a href="http://ubccpd.ca/img">http://ubccpd.ca/img</a>                                                             | IMGs                 |                                                                                                                                                                | IMG orientation conference<br>Archived webinars: non clinical topics eg BC Pharmacists- collaborative Opportunities | IMG Orientation Conference<br>Archived webinars: non clinical topics e.g., BC Pharmacists - collaborative opportunities | Ongoing         | Conference (face-to- face) and online webinars, accredited |
| <b>Canadian Pharmacy Practice Program</b><br><br>University of British Columbia, Pharmaceutical Sciences<br><br><a href="http://cpd.pharmacy.ubc.ca/content/program-details">http://cpd.pharmacy.ubc.ca/content/program-details</a> | Pharmacists          | Patient Dialogue Skills (inc cultural differences in patients' responses to HCPs) Communications (inc impact of diversity, culture and styles within workplace | Communication                                                                                                       | Communication (inc workplace culture, diversity, inter and intra-prof communication)                                    | 24 weeks        | 12 wks classroom, 12.5 wks practical                       |

| MANITOBA                                                                                                                                                                                                                                                                               |                         |                                                                                    |                                                                                                                                                                    |                                                                                                                                                                                                                                       |                                                                                                              |                                                                           |
|----------------------------------------------------------------------------------------------------------------------------------------------------------------------------------------------------------------------------------------------------------------------------------------|-------------------------|------------------------------------------------------------------------------------|--------------------------------------------------------------------------------------------------------------------------------------------------------------------|---------------------------------------------------------------------------------------------------------------------------------------------------------------------------------------------------------------------------------------|--------------------------------------------------------------------------------------------------------------|---------------------------------------------------------------------------|
| Course Information:<br>Name, Inst., Dept.,<br>Weblink                                                                                                                                                                                                                                  | Target<br>Professionals | Course Content                                                                     |                                                                                                                                                                    |                                                                                                                                                                                                                                       | Course<br>Duration                                                                                           | Delivery<br>Format                                                        |
|                                                                                                                                                                                                                                                                                        |                         | Cultural Diversity                                                                 | Canadian Health Care<br>Orientation                                                                                                                                | IP Competencies                                                                                                                                                                                                                       |                                                                                                              |                                                                           |
| <b>International Medical Graduate Program – Orientation</b><br><br>University of Manitoba<br><br><a href="http://umanitoba.ca/faculties/medicine/education/imgp/index.html">http://umanitoba.ca/faculties/medicine/education/imgp/index.html</a>                                       | Physicians              | Provides socio-cultural training and ethics                                        | Overview of Canadian health care system<br>Presents model of typical Canadian learning setting<br>Overview of role of the physician in Canadian health care system | Overview of role of the physician in Canadian health care system<br>Overview of patient-centred approach<br>Team-based practice environment<br>Provides training in patient-centred interviewing                                      | 4 weeks                                                                                                      | Face-to-face                                                              |
| <b>Canadian Culture and Communication for Nurses</b><br><br>Manitoba Nurse's Union<br><br><a href="http://www.manitobanurses.ca">http://www.manitobanurses.ca</a>                                                                                                                      | RNs                     | Advanced cultural communication covers culturally sensitive care and communication | Language proficiency modules (3)                                                                                                                                   | Module 1: Topics - language, listening, assertiveness/sensitive topics, asking questions<br>Module 2: Topics - general nursing language, communication, establishing relationships<br>Module 3: Covers advance cultural communication | 3 modules<br>13 weeks for each of the                                                                        | Blended:<br>Online = 60 hrs<br>Face-to-face = 60 hrs<br>Blended = 120 hrs |
| <b>Bridging Program for Internationally Educated Nurses</b><br>Red River College<br><br>First level if nurses need to upgrade English language skills<br><br><a href="http://me.rrc.mb.ca/Catalogue/ProgramInfo.aspx?Region">http://me.rrc.mb.ca/Catalogue/ProgramInfo.aspx?Region</a> | RNs                     |                                                                                    | Overview of the Canadian health care setting                                                                                                                       | Critical thinking<br>Communication                                                                                                                                                                                                    | Level 1:<br>16 weeks - courses<br>Level 2:<br>16 weeks - courses<br>Level 3:<br>6 weeks – clinical practicum |                                                                           |

| MANITOBA                                                                                                                                                                                                                                                     |                                            |                                                                                                                                                     |                                                                                                                                          |                                                                                                                                                                                                                                                      |                             |                                                                                                               |
|--------------------------------------------------------------------------------------------------------------------------------------------------------------------------------------------------------------------------------------------------------------|--------------------------------------------|-----------------------------------------------------------------------------------------------------------------------------------------------------|------------------------------------------------------------------------------------------------------------------------------------------|------------------------------------------------------------------------------------------------------------------------------------------------------------------------------------------------------------------------------------------------------|-----------------------------|---------------------------------------------------------------------------------------------------------------|
| Course Information:<br>Name, Inst., Dept.,<br>Weblink                                                                                                                                                                                                        | Target<br>Professionals                    | Course Content                                                                                                                                      |                                                                                                                                          |                                                                                                                                                                                                                                                      | Course<br>Duration          | Delivery<br>Format                                                                                            |
|                                                                                                                                                                                                                                                              |                                            | Cultural Diversity                                                                                                                                  | Canadian Health Care<br>Orientation                                                                                                      | IP Competencies                                                                                                                                                                                                                                      |                             |                                                                                                               |
| <a href="#">Code=WPG&amp;ProgCode=BR<br/>IPF-NA</a>                                                                                                                                                                                                          |                                            |                                                                                                                                                     |                                                                                                                                          |                                                                                                                                                                                                                                                      |                             |                                                                                                               |
| <b>International Pharmacy<br/>Graduates Study Group</b><br>(Government Grant through<br>MB Health/Office of the<br>Manitoba Fairness<br>Commissioner)                                                                                                        | Internationally<br>Educated<br>Pharmacists | Course content covers<br>cultural diversity                                                                                                         | Canadian Health Care<br>Orientation is also<br>covered the sessions                                                                      | Covers IP competencies                                                                                                                                                                                                                               | 2-hr weekly<br>lectures     | Classroom                                                                                                     |
| <b>Communication for<br/>Internationally-Educated<br/>Health Professionals<br/>(CIEHP)</b><br><br><a href="http://blogs.rrc.ca/ltc/programs/permanent-residents/esp/">http://blogs.rrc.ca/ltc/programs/permanent-residents/esp/</a>                          | All IEHPs                                  | Socio-cultural and<br>strategic competence<br>Language proficiency                                                                                  | Intro to Language and<br>Communication in Health<br>Care<br>Overview of Health Care<br>in Canada and Manitoba<br>Language of health care | Patient-centred practice<br>Effective interviewing<br>Professional<br>communication<br>Therapeutic<br>communication<br>Collaborative Practice<br>(IDT)<br>Challenging patients<br>Strategies for effective<br>communication and<br>lifelong learning | 70 hrs over 7<br>weeks      | Blended<br>online<br>(4hrs/wk)<br>10 face-to-<br>face<br>workshops (2<br>x 3 hr<br>workshops =<br>6 hrs/week) |
| <b>Canadian Culture and<br/>Communication for Nurses</b><br><br><a href="https://cccn.manitobanurses.ca">https://cccn.manitobanurses.ca</a>                                                                                                                  | Internationally<br>educated<br>nurses      | Covers communication<br>skills and also Aboriginal<br>awareness                                                                                     |                                                                                                                                          | One module focuses on<br>Patient Centred Care                                                                                                                                                                                                        | 3 modules, 12<br>weeks each | Two are<br>blended; one<br>online                                                                             |
| <b>Professional Practice<br/>Seminars for Allied Health<br/>Nursing</b><br><br><a href="https://www.cmltm.ca/cms-assets/documents/199973-998743.ppsforiehps-feb2015.pdf">https://www.cmltm.ca/cms-assets/documents/199973-998743.ppsforiehps-feb2015.pdf</a> | All IEHPs                                  | Module 1: Cross-Cultural<br>Awareness, Part 1 (Self-<br>awareness and Non-verbal<br>Communication)<br>Module 2: Cross-Cultural<br>Awareness, Part 2 | Covers an Introduction to<br>the Canadian Health Care<br>System                                                                          | Developing Relational<br>("Soft") Skills in a<br>Canadian Context, Part 1<br>(Professional<br>Communication) and Part<br>2 (Therapeutic<br>Communication; Conflict<br>Management)                                                                    | 18-20 hrs                   | 5 face-to-face<br>seminars                                                                                    |

| MANITOBA                                                                                                                                                                                                                                                          |                         |                    |                                     |                 |                    |                       |
|-------------------------------------------------------------------------------------------------------------------------------------------------------------------------------------------------------------------------------------------------------------------|-------------------------|--------------------|-------------------------------------|-----------------|--------------------|-----------------------|
| Course Information:<br>Name, Inst., Dept.,<br>Weblink                                                                                                                                                                                                             | Target<br>Professionals | Course Content     |                                     |                 | Course<br>Duration | Delivery<br>Format    |
|                                                                                                                                                                                                                                                                   |                         | Cultural Diversity | Canadian Health Care<br>Orientation | IP Competencies |                    |                       |
|                                                                                                                                                                                                                                                                   |                         |                    |                                     |                 |                    |                       |
| <b>Practical Nursing<br/>Refresher</b><br><br>Assiniboine Community<br>College<br><br><a href="http://assiniboine.net/program/128/practical-nursing-refresher/program-details">http://assiniboine.net/program/128/practical-nursing-refresher/program-details</a> | LPNs                    |                    | Health Care System                  |                 | 4 months           | Distance<br>Education |



| SASKATCHEWAN                                                                                                                                                                                                                                                                                                                                                                                                     |                         |                                                                                                               |                                                                                                                                                                                                                                                                        |                                                                                                                                                                                                                                                                      |                             |                                                       |
|------------------------------------------------------------------------------------------------------------------------------------------------------------------------------------------------------------------------------------------------------------------------------------------------------------------------------------------------------------------------------------------------------------------|-------------------------|---------------------------------------------------------------------------------------------------------------|------------------------------------------------------------------------------------------------------------------------------------------------------------------------------------------------------------------------------------------------------------------------|----------------------------------------------------------------------------------------------------------------------------------------------------------------------------------------------------------------------------------------------------------------------|-----------------------------|-------------------------------------------------------|
| Course Information:<br>Name, Inst., Dept.,<br>Weblink                                                                                                                                                                                                                                                                                                                                                            | Target<br>Professionals | Course Content                                                                                                |                                                                                                                                                                                                                                                                        |                                                                                                                                                                                                                                                                      | Course<br>Duration          | Delivery<br>Format                                    |
|                                                                                                                                                                                                                                                                                                                                                                                                                  |                         | Cultural Diversity                                                                                            | Canadian Health Care<br>Orientation                                                                                                                                                                                                                                    | IP Competencies                                                                                                                                                                                                                                                      |                             |                                                       |
| <b>Orientation to Nursing in Canada for Internationally Educated Nurses</b><br><br>Saskatchewan Polytechnic<br><br><a href="http://saskpolytech.ca/programs-and-courses/programs/Orientation-to-Nursing-in-Canada-for-Internationally-Educated-Nurses.aspx">http://saskpolytech.ca/programs-and-courses/programs/Orientation-to-Nursing-in-Canada-for-Internationally-Educated-Nurses.aspx</a>                   | RNs                     | Explore issues generated by language barriers and cultural differences<br>NRSRG 221: Common Health Challenges | Canadian health care system, medical technology, terminology, drug therapy theory in Canada<br>Courses include:<br>CLIN 209: Clinical experience<br>NRSRG 219: Nursing in Canada 1<br>NRSRG 251: Professional Nursing in Canada<br>NRSRG 221: Common Health Challenges | NRSRG 224: Communications 1<br>NRSRG 225: Communications 2<br>NRSRG 226: Communications 3                                                                                                                                                                            | 32 weeks of full-time study | Face-to-face instruction or distance learning options |
| <b>Integration to the Canadian Workplace</b><br><br>Saskatchewan Pathways – IEHP Support, Bridging & Integration<br><br><i>*Joint initiative by Saskatoon Health Region and Saskatchewan Ministry of Health</i><br><br><a href="http://www.healthcareerpath.sk.ca/iehp-saskatchewan/resources/Bridging-and-Education/">http://www.healthcareerpath.sk.ca/iehp-saskatchewan/resources/Bridging-and-Education/</a> | OTs<br>PTs<br>LPNs      |                                                                                                               | Module 1: Meeting expectations in the Canadian Workplace                                                                                                                                                                                                               | Module 2: Communication for the Canadian Workplace<br>Module 3: Pronouncing English Clearly<br><br>Also helps access Intensive health care specific language training for those health care professionals who hope to work in their respective professions in Canada |                             | Classroom Community                                   |
| <b>Internationally Educated Nurses (registration prep)</b><br>- included Sask Polytechnic course                                                                                                                                                                                                                                                                                                                 | LPNs                    | Covers assumptions about diversity                                                                            | Orientation to role of LPN and health care system and standards of care                                                                                                                                                                                                | Covers multi-disc practice and group dynamics, collegiality                                                                                                                                                                                                          |                             | Online                                                |

| SASKATCHEWAN                                                                                                                                                                                                                                                                                                                                      |                         |                                                                                                                                    |                                                                          |                                                                                     |                                                                                                  |                    |
|---------------------------------------------------------------------------------------------------------------------------------------------------------------------------------------------------------------------------------------------------------------------------------------------------------------------------------------------------|-------------------------|------------------------------------------------------------------------------------------------------------------------------------|--------------------------------------------------------------------------|-------------------------------------------------------------------------------------|--------------------------------------------------------------------------------------------------|--------------------|
| Course Information:<br>Name, Inst., Dept.,<br>Weblink                                                                                                                                                                                                                                                                                             | Target<br>Professionals | Course Content                                                                                                                     |                                                                          |                                                                                     | Course<br>Duration                                                                               | Delivery<br>Format |
|                                                                                                                                                                                                                                                                                                                                                   |                         | Cultural Diversity                                                                                                                 | Canadian Health Care<br>Orientation                                      | IP Competencies                                                                     |                                                                                                  |                    |
| Roles, Responsibilities and Ethics of the Licensed Practical Nurses<br>Saskatchewan Association of Licensed Practical Nurses with Saskatchewan Polytechnic<br><a href="http://www.salpn.com/member/out-of-province-country/internationally-educated-nurse">http://www.salpn.com/member/out-of-province-country/internationally-educated-nurse</a> |                         |                                                                                                                                    |                                                                          |                                                                                     |                                                                                                  |                    |
| <b>International Medical Graduate Support Program</b><br>University of Saskatchewan<br>Division of Continuing Medical Education<br><a href="http://www.usask.ca/cme/programs/img-support-program/index.php">http://www.usask.ca/cme/programs/img-support-program/index.php</a>                                                                    | Physicians              | Enhance professional profile by involvement in and contact with the Canadian health care system through various program components | Orientation to the Canadian system                                       |                                                                                     | Information not available                                                                        | Face-to-face       |
| <b>Orientation and Assessment</b><br>University of Saskatchewan, post-grad medical education<br><a href="http://www.medicine.usask.ca/education/medical/postgrad/education/img-assessment-orientation.php">http://www.medicine.usask.ca/education/medical/postgrad/education/img-assessment-orientation.php</a>                                   | Physicians              |                                                                                                                                    | Intro to Canadian System and practice in Saskatchewan                    | Familiarization of with nuances of communication for Canadian practice              | 6 weeks program in prep for IMG Post-grad y1 training<br>Interactive sessions and buddy sessions |                    |
| <b>Saskatchewan International Physician Practice Assessment (SIPPA)</b><br>University of Saskatchewan                                                                                                                                                                                                                                             | Physicians              |                                                                                                                                    | Provides context for the practice of family medicine in Saskatchewan and | Courses:<br>Patient-centred care<br>Communication skills<br>Professional boundaries | 11 weeks orientation clinical field assessment                                                   | Face-to-face       |

| SASKATCHEWAN                                                                                                                                                                                                   |                         |                    |                                           |                                                                                                                                     |                    |                    |
|----------------------------------------------------------------------------------------------------------------------------------------------------------------------------------------------------------------|-------------------------|--------------------|-------------------------------------------|-------------------------------------------------------------------------------------------------------------------------------------|--------------------|--------------------|
| Course Information:<br>Name, Inst., Dept.,<br>Weblink                                                                                                                                                          | Target<br>Professionals | Course Content     |                                           |                                                                                                                                     | Course<br>Duration | Delivery<br>Format |
|                                                                                                                                                                                                                |                         | Cultural Diversity | Canadian Health Care<br>Orientation       | IP Competencies                                                                                                                     |                    |                    |
| <i>**Pilot program to 2012**</i><br>Division of Continuing<br>Medical Education<br><br><a href="http://www.saskdocs.ca/work/family-physician---imgs/">http://www.saskdocs.ca/work/family-physician---imgs/</a> |                         |                    | prepare candidates for<br>writing exams - | Roles of other health<br>professions and<br>Interprofessional care<br>Cultural issues<br>Medical legal issues<br>Physician wellness |                    |                    |

| OTHER PROVINCES                                                                                                                                                                                                                                                                                                                                  |                         |                                                                                    |                                                                       |                                                                                                                      |                    |                                        |
|--------------------------------------------------------------------------------------------------------------------------------------------------------------------------------------------------------------------------------------------------------------------------------------------------------------------------------------------------|-------------------------|------------------------------------------------------------------------------------|-----------------------------------------------------------------------|----------------------------------------------------------------------------------------------------------------------|--------------------|----------------------------------------|
| Course Information:<br>Name, Inst., Dept., Weblink                                                                                                                                                                                                                                                                                               | Target<br>Professionals | Course Content                                                                     |                                                                       |                                                                                                                      | Course<br>Duration | Delivery<br>Format                     |
|                                                                                                                                                                                                                                                                                                                                                  |                         | Cultural Diversity                                                                 | Canadian Health Care<br>Orientation                                   | IP Competencies                                                                                                      |                    |                                        |
| <b>Ontario - Orientation to Training and Practice in Canada (OTPC)</b><br><br>Centre for the Evaluation of Health Professionals Educated Abroad<br><br><a href="http://www.kehpea.ca/programs/practiceInCanada.htm">http://www.kehpea.ca/programs/practiceInCanada.htm</a>                                                                       | Physicians              |                                                                                    | This course covers aspects of medical culture in Ontario              |                                                                                                                      | 3 weeks            | Blend of classroom and online learning |
| <b>Interprofessional Education for Internationally Educated Nurses</b><br><br>Guide to support clinical placement for IEHPS<br>Report produced by Toronto Rehab and George Brown College (2012)<br><br><a href="http://www.coned.georgebrown.ca/documents/IPE-IEN-Toolkit.pdf">http://www.coned.georgebrown.ca/documents/IPE-IEN-Toolkit.pdf</a> | RNs                     | Professional Cultural Considerations for IENs                                      | Orientation to start working in new country is included in the module | Learning around the competencies involved in IP collaboration and care<br><br>Leading and Co-ordinating IPE for IENs | 12 weeks           | Designed to deliver face-to-face       |
| <b>Orientation to the Canadian Health Care System for Internationally Educated Health Care Professionals</b><br><br>The Registered Nurses Professional Development Centre, Halifax                                                                                                                                                               | RNs                     | Culture, Diversity and Cultural Competence<br>Current Health Care Issues in Canada | Canadian Health Care Professionals and their Practice                 | The orientation modules include learning about IP practice                                                           | Two 3-hr sessions  | Face to face Classroom                 |

| OTHER PROVINCES                                                                                                                                                                                                                                                                                                                                                                                                                                                                                                                                                |                                                   |                                                                                             |                                                                                                     |                                                                                                                                                                                                                                      |                         |                                                                                               |
|----------------------------------------------------------------------------------------------------------------------------------------------------------------------------------------------------------------------------------------------------------------------------------------------------------------------------------------------------------------------------------------------------------------------------------------------------------------------------------------------------------------------------------------------------------------|---------------------------------------------------|---------------------------------------------------------------------------------------------|-----------------------------------------------------------------------------------------------------|--------------------------------------------------------------------------------------------------------------------------------------------------------------------------------------------------------------------------------------|-------------------------|-----------------------------------------------------------------------------------------------|
| Course Information:<br>Name, Inst., Dept., Weblink                                                                                                                                                                                                                                                                                                                                                                                                                                                                                                             | Target Professionals                              | Course Content                                                                              |                                                                                                     |                                                                                                                                                                                                                                      | Course Duration         | Delivery Format                                                                               |
|                                                                                                                                                                                                                                                                                                                                                                                                                                                                                                                                                                |                                                   | Cultural Diversity                                                                          | Canadian Health Care Orientation                                                                    | IP Competencies                                                                                                                                                                                                                      |                         |                                                                                               |
| <a href="http://www.crnns.ca/documents/OCHC_Flyer_NS_Jan-March_2015.pdf">http://www.crnns.ca/documents/OCHC_Flyer_NS_Jan-March_2015.pdf</a><br><a href="http://www.rnpdc.nshealth.ca/images/pdf/Information_Sheet_for_IEHP_September_2014%5B1%5D.pdf">http://www.rnpdc.nshealth.ca/images/pdf/Information_Sheet_for_IEHP_September_2014%5B1%5D.pdf</a><br><br>Also RN Bridging/Re-entry program<br><br><a href="http://www.rnpdc.nshealth.ca/InternationalLearners/IntRN%20Bridging/">http://www.rnpdc.nshealth.ca/InternationalLearners/IntRN%20Bridging/</a> |                                                   |                                                                                             |                                                                                                     |                                                                                                                                                                                                                                      |                         |                                                                                               |
| <b>Workplace Communication Skills for Interprofessional Health Care offered by Occupation-specific Language Training (OSLT)</b><br><br>Currently offered at three places Centennial college, Conestoga college and George Brown college<br><br><a href="http://co-oslt.org/en/free-workplace-language-training-available-for-internationally-educated-health-professionals/">http://co-oslt.org/en/free-workplace-language-training-available-for-internationally-educated-health-professionals/</a>                                                           | Dieticians<br>RNs<br>OTs<br>PTs<br>Social Workers |                                                                                             | Awareness about health care workplaces in Ontario such as clinics, community agencies and hospitals | Focus on better communication for IP health care teams<br>Mainly focused on how health care professionals communicate with other health care professionals including patient progress notes which can be read by other professionals | 140 hrs                 | Blended format that includes 60 – 80 hours classroom-based instruction and the rest is online |
| <b>Orientation to the Canadian Health Care System, Culture and Context</b>                                                                                                                                                                                                                                                                                                                                                                                                                                                                                     | All IEHPs                                         | In Unit 2, learners will explore key concepts related to culture, how they apply to care in | Canadian expectations surrounding professionalism and life-long learning                            | Unit 4 is an introduction to collaborative practice, as well as the conflict resolution strategies and                                                                                                                               | Delivered over 10 weeks | Online                                                                                        |

| OTHER PROVINCES                                                                                                                                                                                                                                                                                                                                           |                         |                                                                                                                                                                                                                                        |                                                                                                                                                                                                                                         |                                                                                                          |                    |                    |
|-----------------------------------------------------------------------------------------------------------------------------------------------------------------------------------------------------------------------------------------------------------------------------------------------------------------------------------------------------------|-------------------------|----------------------------------------------------------------------------------------------------------------------------------------------------------------------------------------------------------------------------------------|-----------------------------------------------------------------------------------------------------------------------------------------------------------------------------------------------------------------------------------------|----------------------------------------------------------------------------------------------------------|--------------------|--------------------|
| Course Information:<br>Name, Inst., Dept., Weblink                                                                                                                                                                                                                                                                                                        | Target<br>Professionals | Course Content                                                                                                                                                                                                                         |                                                                                                                                                                                                                                         |                                                                                                          | Course<br>Duration | Delivery<br>Format |
|                                                                                                                                                                                                                                                                                                                                                           |                         | Cultural Diversity                                                                                                                                                                                                                     | Canadian Health Care<br>Orientation                                                                                                                                                                                                     | IP Competencies                                                                                          |                    |                    |
| University of Toronto<br><br><a href="http://www.iehpcanada.utoronto.ca/">http://www.iehpcanada.utoronto.ca/</a><br><br><i>Additional information:<br/>This course is recognized by the Canadian Alliance of Physiotherapy Regulators, the Ontario College of Pharmacists, and the Midwives Consortium to address gaps in knowledge for licensing</i>     |                         | practice, and a language-focused strategy to facilitate effective communication between those of different backgrounds in order to avoid misinterpretation of non-verbal signals is presented<br>Culture and its impact on health care |                                                                                                                                                                                                                                         | feedback-related skills that enable collaboration                                                        |                    |                    |
| <b>Physiotherapy and the Canadian Health Care System</b> (Ontario)<br><br><a href="http://www.physicaltherapy.utoronto.ca/iept/online-hybrid-courses/physiotherapy-practice-within-the-canadian-health-care-context">http://www.physicaltherapy.utoronto.ca/iept/online-hybrid-courses/physiotherapy-practice-within-the-canadian-health-care-context</a> | PTs                     | Cultural Competence and Roles of the Canadian Physical Therapist<br>Enhance skills in managing cultural differences                                                                                                                    | Increase understanding of how physical therapy is practised in Ontario and Canada<br>Roles of the Canadian Physical Therapist<br>The Role of the Federal and Provincial Government in Health Care<br>Regulations, and Scope of Practice | The Continuum of Care: Where Physiotherapists Work<br>Teams and the use of Support Personnel and wrap up | 6 weeks            | Online course      |

|                                                                                                                                                                                                                                                                                                                                                                 |                                          |                                                                                                                                                                       |                                                                                                                                                                |                                                                                                                                                                                                                  |                                    |                 |
|-----------------------------------------------------------------------------------------------------------------------------------------------------------------------------------------------------------------------------------------------------------------------------------------------------------------------------------------------------------------|------------------------------------------|-----------------------------------------------------------------------------------------------------------------------------------------------------------------------|----------------------------------------------------------------------------------------------------------------------------------------------------------------|------------------------------------------------------------------------------------------------------------------------------------------------------------------------------------------------------------------|------------------------------------|-----------------|
| <b>Canadian Health Care System for Internationally Educated Health Professionals</b><br>Mohawk College Hamilton, ON, Canada (via McMaster university campus)<br><br><a href="http://www.mohawkcollege.ca/Assets/International/PDFs/Canadian+Health+Care+Syst em.pdf">http://www.mohawkcollege.ca/Assets/International/PDFs/Canadian+Health+Care+Syst em.pdf</a> | All IEHPs                                | Demonstrate intercultural competence by developing and implementing effective strategies to apply in various cultural environments which address cultural differences | Introduction to the Canadian Health Care System                                                                                                                | Compare the duties, responsibilities and professional and ethical obligations of various health care professionals in Ontario and analyse how these professionals interact within the greater health care system | 1 year certificate (two semesters) | Classroom based |
| <b>The Medical Licence Bridging Program</b><br><br>Ottawa<br><br><a href="http://www.imd-ottawa.ca/components.htm">http://www.imd-ottawa.ca/components.htm</a><br><br><i>*services not being delivered at the time of this scan*</i>                                                                                                                            | IMGs                                     | It covers how to overcome cultural barriers                                                                                                                           | Canadian Medical Workplace Culture:<br>Ethical aspects of practice<br>Legal aspects of practice<br>Organizational aspects of practice, and<br>Community health | Communication challenges (sexual history, cross-cultural interviews, IP conflict, etc.)                                                                                                                          | 120 hrs                            | Classroom based |
| <b>Bridge to Practical Nursing for Internationally Educated Health Professionals (Graduate Certificate)</b><br><br>Ontario College Graduate Certificate, Conestoga<br><br><a href="http://www.conestogac.on.ca/fulltime/1321.jsp">http://www.conestogac.on.ca/fulltime/1321.jsp</a>                                                                             | RNs                                      | One module focus on Intercultural Health Issues                                                                                                                       | Focus on oral and written communications in a health care environment and cultural aspects of the Canadian health care system                                  | Professional nursing practice covers intra and IP practice in multi-disciplinary teams                                                                                                                           | 23 weeks                           | Classroom based |
| <b>The Bridge Training Program for Internationally Trained Psychologists and Allied Mental Health Professionals (BTMH)</b>                                                                                                                                                                                                                                      | RPN and Allied mental health professions | Introduction to workplace and Canadian culture provided                                                                                                               | Participants will also learn about workplace culture for the mental health sector in Ontario                                                                   | NA                                                                                                                                                                                                               | 200 hrs                            | Classroom based |

|                                                                                                                                                                                                                                                                                                                                                                                 |                                                       |                                                                    |                                             |    |          |                                                                                                                 |
|---------------------------------------------------------------------------------------------------------------------------------------------------------------------------------------------------------------------------------------------------------------------------------------------------------------------------------------------------------------------------------|-------------------------------------------------------|--------------------------------------------------------------------|---------------------------------------------|----|----------|-----------------------------------------------------------------------------------------------------------------|
| Mennonite New Life Centre<br>of Toronto<br><br><a href="http://www.bridgingprograms.org/">http://www.bridgingprograms.org/</a>                                                                                                                                                                                                                                                  |                                                       |                                                                    |                                             |    |          |                                                                                                                 |
| <b>Internationally Trained Medical Doctors (ITMD) Bridging Program</b><br><br>Pilot program for medically qualified Canadian citizens/permanent residents to enter <i>non-licensed jobs</i><br>Ryerson University<br><br><a href="http://ce-online.ryerson.ca/ce/default.aspx?id=3607">http://ce-online.ryerson.ca/ce/default.aspx?id=3607</a>                                  | IMGs                                                  |                                                                    | Introduction to Canadian workplace culture  | NA | 11 weeks | Classroom                                                                                                       |
| <b>Practical Nursing Bridging Program for Internationally-Educated Nurses</b><br>Centennial College, Ontario<br><br><a href="http://www.centennialcollege.ca/programs-courses/full-time/practical-nursing-bridging-internationally-educated-nurses/">http://www.centennialcollege.ca/programs-courses/full-time/practical-nursing-bridging-internationally-educated-nurses/</a> | RNs                                                   | College Communications 1 (ESL) for Internationally Educated Nurses | Introduction to Nursing in Ontario          | NA | 1 year   | Classroom                                                                                                       |
| <b>The Association of Faculties of Medicine of Canada</b><br>Dalhousie University<br><br><i>Educating for cultural awareness: A cultural diversity training program for teachers of internationally</i>                                                                                                                                                                         | Not directly for IEHPs<br>Aimed at educators of IEHPs | Cultural Awareness: A Cultural Diversity Training Program          | Introduction to Canadian health care system |    |          | The module is available online free of cost to use to create cultural awareness among health care professionals |



|                                                                                                                                                                                                                                                                                       |                              |                                                          |                                                                                                                                                                                                                                                                                                                                                                                                                                             |                                                                           |                                         |                                                                                       |
|---------------------------------------------------------------------------------------------------------------------------------------------------------------------------------------------------------------------------------------------------------------------------------------|------------------------------|----------------------------------------------------------|---------------------------------------------------------------------------------------------------------------------------------------------------------------------------------------------------------------------------------------------------------------------------------------------------------------------------------------------------------------------------------------------------------------------------------------------|---------------------------------------------------------------------------|-----------------------------------------|---------------------------------------------------------------------------------------|
| <i>educated health care professionals</i><br><a href="http://www.r-scope.ca/websitepublisher/downloads/Educating%20for%20Cultural%20Awareness.pdf">http://www.r-scope.ca/websitepublisher/downloads/Educating%20for%20Cultural%20Awareness.pdf</a>                                    |                              |                                                          |                                                                                                                                                                                                                                                                                                                                                                                                                                             |                                                                           |                                         |                                                                                       |
| <b>Canadian Health Care Academy</b><br><a href="http://www.chcabc.com/chca_program_rnlp.html">http://www.chcabc.com/chca_program_rnlp.html</a>                                                                                                                                        | RN                           | Cultural awareness                                       | Introduction to Canadian health care system<br>Nursing values and ethics                                                                                                                                                                                                                                                                                                                                                                    |                                                                           | 1 year certificate program              | Classroom                                                                             |
| <b>Communication Skills Modules, HIRE IEHPs Project</b><br><br>University of Toronto<br><a href="http://hireiehps.com/moodle/">http://hireiehps.com/moodle/</a>                                                                                                                       | IEHPs                        |                                                          | Module 1: Pandemic Communication Matters<br>Module 2: Diversity Communication Matters<br>Module 3: Teamwork Communication Matters<br>Module 4: Interpersonal Conflict & Module 5: End of Life                                                                                                                                                                                                                                               |                                                                           | 5 modules (45 mins each)                | Online modules                                                                        |
| <b>OTepp Certificate Program by Occupational Therapy examination and practice preparation project for internationally educated occupational therapists</b><br><a href="http://www.otepp.ca/modules/module-descriptions.aspx">http://www.otepp.ca/modules/module-descriptions.aspx</a> | Internationally educated OTs | Culture: Competence, Practice Settings and Acculturation | Includes 5 major courses that helps in understanding OT in Canada<br>Course 1 - Managing Practice, Responsibility and Professional Development: January 23<br>Course 2 - Communication, Collaboration and Practice Knowledge: March 6<br>Course 3 - Understanding Evidence and Using It in Practice: April 3<br>Course 4 - Clinical Reasoning and Critical Thinking in a Practice Process: May 1<br>Course 5 - Supervised Practicum: June 4 | Working on a Team including Supervision of Support Personnel and Students | 2 x 3 hr classes each week for 4 months | Face-to-face classes available for this module at McMaster University in Hamilton, ON |
